# Supplementary material for: Enhancing Distribution System Performance via Distributed Generation Placement and Reconfiguration Based on Improved Symbiotic Organisms Search
Source: Hindawi journal article supplement (doi:10.1155/2023/6081991), 2023-03-09
Supplement: f1 [file 6081991.f1.docx]

Supplementary document for “Enhancing Distribution System Performance via Distributed Generation Placement and Reconfiguration based on Improved Symbiotic Organisms Search”

**Table S.1.** System data of 33-node system

| Sending bus no. | Receiving bus no. | Resistance  R (Ω) | Reactance  X (Ω) | Load at receiving end bus | |
| --- | --- | --- | --- | --- | --- |
| P(kW) | Q(kVAr) |
| 1 | 2 | 0.0922 | 0.047 | 100 | 60 |
| 2 | 3 | 0.4930 | 0.2511 | 90 | 40 |
| 3 | 4 | 0.3660 | 0.1864 | 120 | 80 |
| 4 | 5 | 0.3811 | 0.1941 | 60 | 30 |
| 5 | 6 | 0.8190 | 0.7070 | 60 | 20 |
| 6 | 7 | 0.1872 | 0.6188 | 200 | 100 |
| 7 | 8 | 1.7114 | 1.2351 | 200 | 100 |
| 8 | 9 | 1.0300 | 0.7400 | 60 | 20 |
| 9 | 10 | 1.0440 | 0.7400 | 60 | 20 |
| 10 | 11 | 0.1966 | 0.0650 | 45 | 30 |
| 11 | 12 | 0.3744 | 0.1238 | 60 | 35 |
| 12 | 13 | 1.4680 | 1.1550 | 60 | 35 |
| 13 | 14 | 0.5416 | 0.7129 | 120 | 80 |
| 14 | 15 | 0.5910 | 0.5260 | 60 | 10 |
| 15 | 16 | 0.7463 | 0.5450 | 60 | 20 |
| 16 | 17 | 1.2890 | 1.7210 | 60 | 20 |
| 17 | 18 | 0.7320 | 0.5740 | 90 | 40 |
| 2 | 19 | 0.1640 | 0.1565 | 90 | 40 |
| 19 | 20 | 1.5042 | 1.3554 | 90 | 40 |
| 20 | 21 | 0.4095 | 0.4784 | 90 | 40 |
| 21 | 22 | 0.7089 | 0.9373 | 90 | 40 |
| 3 | 23 | 0.4512 | 0.3083 | 90 | 50 |
| 23 | 24 | 0.8980 | 0.7091 | 420 | 200 |
| 24 | 25 | 0.8960 | 0.7011 | 420 | 200 |
| 6 | 26 | 0.2030 | 0.1034 | 60 | 25 |
| 26 | 27 | 0.2842 | 0.1447 | 60 | 25 |
| 27 | 28 | 1.0590 | 0.9337 | 60 | 20 |
| 28 | 29 | 0.8042 | 0.7006 | 120 | 70 |
| 29 | 30 | 0.5075 | 0.2585 | 200 | 600 |
| 30 | 31 | 0.9744 | 0.9630 | 150 | 70 |
| 31 | 32 | 0.3105 | 0.3619 | 210 | 100 |
| 32 | 33 | 0.3410 | 0.5302 | 60 | 40 |

**Table S.2.** System data of 69-node system

| Sending bus no. | Receiving bus no. | Resistance  R (Ω) | Reactance  X (Ω) | Load at receiving end bus | |
| --- | --- | --- | --- | --- | --- |
| P(kW) | Q(kVAr) |
| 1 | 2 | 0.0005 | 0.0012 | 0 | 0 |
| 2 | 3 | 0.0005 | 0.0012 | 0 | 0 |
| 3 | 4 | 0.0015 | 0.0036 | 0 | 0 |
| 4 | 5 | 0.0251 | 0.0294 | 0 | 0 |
| 5 | 6 | 0.3660 | 0.1864 | 0 | 0 |
| 6 | 7 | 0.3811 | 0.1941 | 2.6 | 2.2 |
| 7 | 8 | 0.0922 | 0.0470 | 40.4 | 30 |
| 8 | 9 | 0.0493 | 0.0251 | 75 | 54 |
| 9 | 10 | 0.8190 | 0.2707 | 30 | 22 |
| 10 | 11 | 0.1872 | 0.0619 | 28 | 19 |
| 11 | 12 | 0.7114 | 0.2351 | 145 | 104 |
| 12 | 13 | 1.0300 | 0.3400 | 145 | 104 |
| 13 | 14 | 1.0440 | 0.3450 | 8 | 5.5 |
| 14 | 15 | 1.0580 | 0.3496 | 8 | 5.5 |
| 15 | 16 | 0.1966 | 0.0650 | 0 | 0 |
| 16 | 17 | 0.3744 | 0.1238 | 45.5 | 30 |
| 17 | 18 | 0.0047 | 0.0016 | 60 | 35 |
| 18 | 19 | 0.3276 | 0.1083 | 60 | 35 |
| 19 | 20 | 0.2106 | 0.0696 | 0 | 0 |
| 20 | 21 | 0.3416 | 0.1129 | 1 | 0.6 |
| 21 | 22 | 0.0140 | 0.0046 | 114 | 81 |
| 22 | 23 | 0.1591 | 0.0526 | 5.3 | 3.5 |
| 23 | 24 | 0.3463 | 0.1145 | 0 | 0 |
| 24 | 25 | 0.7488 | 0.2745 | 28 | 20 |
| 25 | 26 | 0.3089 | 0.1021 | 0 | 0 |
| 26 | 27 | 0.1732 | 0.0572 | 14 | 10 |
| 3 | 28 | 0.0044 | 0.0108 | 14 | 10 |
| 28 | 29 | 0.0640 | 0.1565 | 26 | 18.6 |
| 29 | 30 | 0.3978 | 0.1315 | 26 | 18.6 |
| 30 | 31 | 0.0702 | 0.0232 | 0 | 0 |
| 31 | 32 | 0.3510 | 0.1160 | 0 | 0 |
| 32 | 33 | 0.8390 | 0.2816 | 0 | 0 |
| 33 | 34 | 1.7080 | 0.5646 | 14 | 10 |
| 34 | 35 | 1.4740 | 0.4873 | 19.5 | 14 |
| 3 | 36 | 0.0044 | 0.0108 | 6 | 4 |
| 36 | 37 | 0.0640 | 0.1565 | 26 | 18.55 |
| 37 | 38 | 0.1053 | 0.1230 | 26 | 18.55 |
| 38 | 39 | 0.0304 | 0.0355 | 0 | 0 |
| 39 | 40 | 0.0018 | 0.0021 | 24 | 17 |
| 40 | 41 | 0.7283 | 0.8509 | 24 | 17 |
| 41 | 42 | 0.3100 | 0.3623 | 1.2 | 1 |
| 42 | 43 | 0.0410 | 0.0478 | 0 | 0 |
| 43 | 44 | 0.0092 | 0.0116 | 6 | 4.3 |
| 44 | 45 | 0.1089 | 0.1373 | 0 | 0 |
| 45 | 46 | 0.0009 | 0.0012 | 39.2 | 26.3 |
| 4 | 47 | 0.0034 | 0.0084 | 39.2 | 26.3 |
| 47 | 48 | 0.0851 | 0.2083 | 0 | 0 |
| 48 | 49 | 0.2898 | 0.7091 | 79 | 56.4 |
| 49 | 50 | 0.0822 | 0.2011 | 384.7 | 274.5 |
| 8 | 51 | 0.0928 | 0.0473 | 384.7 | 274.5 |
| 51 | 52 | 0.3319 | 0.1114 | 40.5 | 28.3 |
| 9 | 53 | 0.1740 | 0.0886 | 3.6 | 2.7 |
| 53 | 54 | 0.2030 | 0.1034 | 4.3 | 3.5 |
| 54 | 55 | 0.2842 | 0.1447 | 26.4 | 19 |
| 55 | 56 | 0.2813 | 0.1433 | 24 | 17.2 |
| 56 | 57 | 1.5900 | 0.5337 | 0 | 0 |
| 57 | 58 | 0.7837 | 0.2630 | 0 | 0 |
| 58 | 59 | 0.3042 | 0.1006 | 0 | 0 |
| 59 | 60 | 0.3861 | 0.1172 | 100 | 72 |
| 60 | 61 | 0.5075 | 0.2585 | 0 | 0 |
| 61 | 62 | 0.0974 | 0.0496 | 1244 | 888 |
| 62 | 63 | 0.1450 | 0.0738 | 32 | 23 |
| 63 | 64 | 0.7105 | 0.3619 | 0 | 0 |
| 64 | 65 | 1.0410 | 0.5302 | 227 | 162 |
| 11 | 66 | 0.2012 | 0.0611 | 59 | 42 |
| 66 | 67 | 0.0047 | 0.0014 | 18 | 13 |
| 12 | 68 | 0.7394 | 0.2444 | 18 | 13 |
| 68 | 69 | 0.0047 | 0.0016 | 28 | 20 |
